# Supplementary material for: Molecular Characterization of Human Respiratory Syncytial Virus in the Philippines, 2012-2013
Source: PubMed Central journal article supplement (PMC4635013; doi:10.1371/journal.pone.0142192), 2015-11-05
Supplement: pone.0142192.s001.pdf [file pone.0142192.s001.pdf]

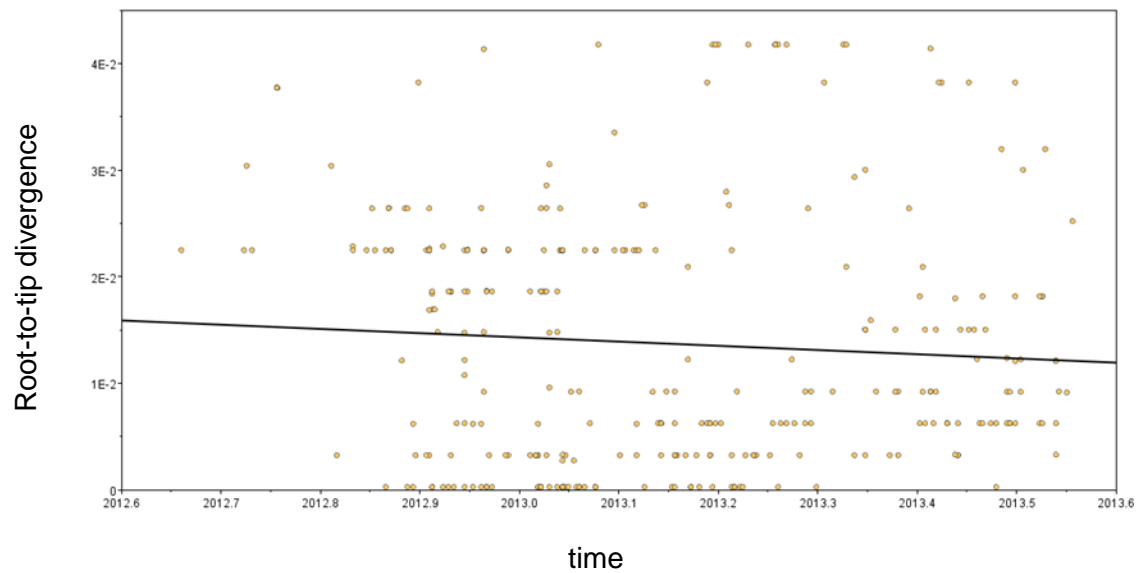

**Figure S1.** Root-to-tip linear regression of HRSV-A strains circulating from Jun 2012-July 2013.

The correlation coefficient ( $r$ ) value was -0.071 and the R-squared ( $r^2$ ) value was 0.005.
