# Supplementary material for: Molecular Characterization of Human Respiratory Syncytial Virus in the Philippines, 2012-2013
Source: PubMed Central journal article supplement (PMC4635013; doi:10.1371/journal.pone.0142192), 2015-11-05
Supplement: pone.0142192.s002.pdf [file pone.0142192.s002.pdf]

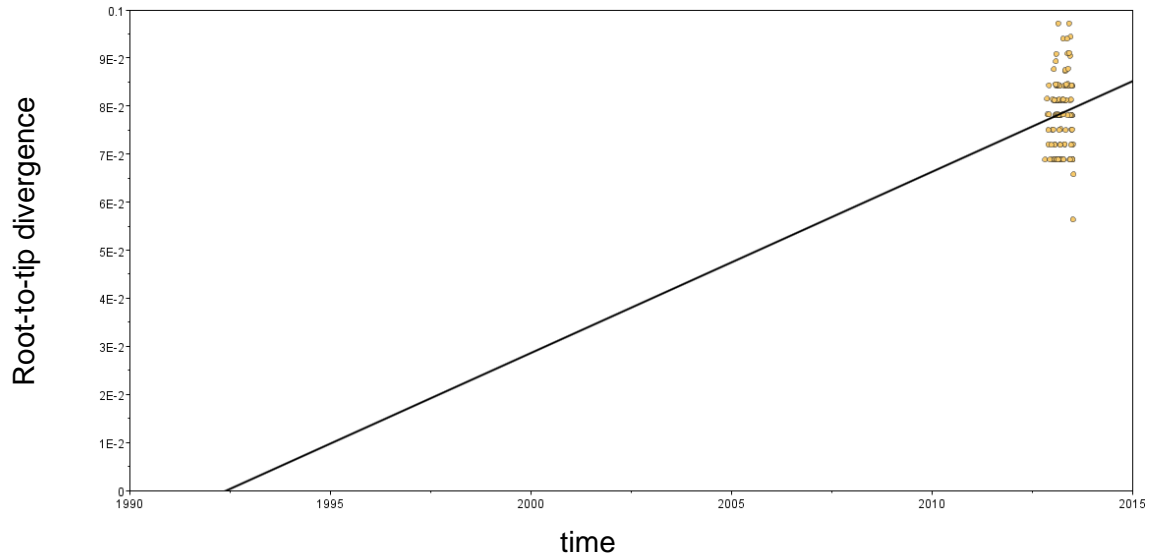

**Figure S2.** Root-to-tip linear regression of HRSV-B strains circulating from Jun 2012-July 2013.

The  $r$  value was 0.089 and the  $r^2$  value was 0.008.
