# Supplementary material for: Molecular Characterization of Human Respiratory Syncytial Virus in the Philippines, 2012-2013
Source: PubMed Central journal article supplement (PMC4635013; doi:10.1371/journal.pone.0142192), 2015-11-05
Supplement: pone.0142192.s004.pdf [file pone.0142192.s004.pdf]

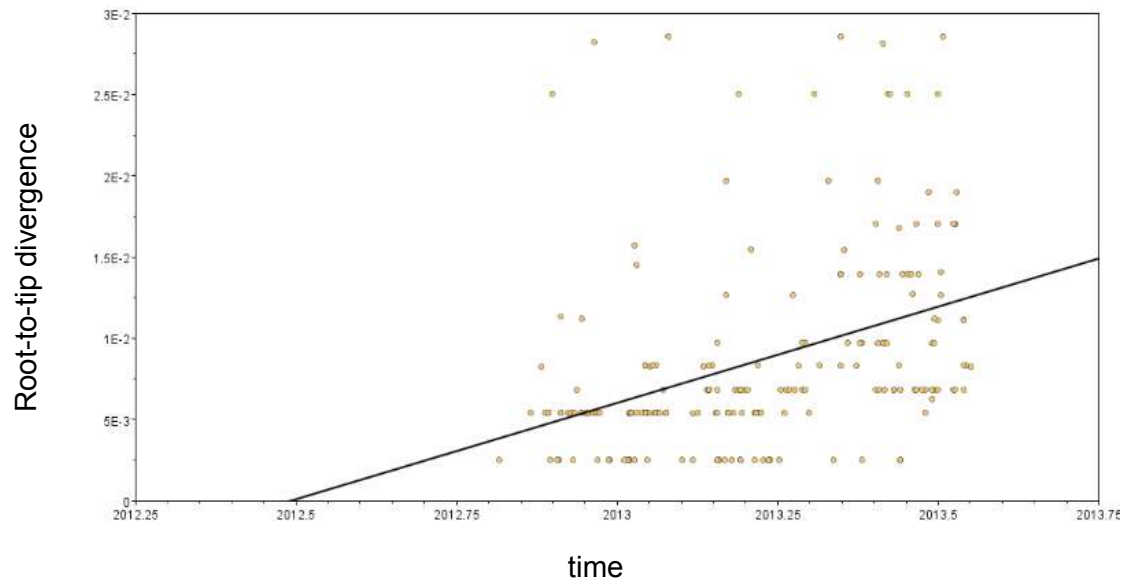

**Figure S4.** Root-to-tip linear regression of ON1 strains circulating from October 2012 – April 2012. The correlation coefficient ( $r$ ) value was 0.3951 and the R-squared ( $r^2$ ) value was 0.1561.
