# Supplementary material for: Molecular Characterization of Human Respiratory Syncytial Virus in the Philippines, 2012-2013
Source: PubMed Central journal article supplement (PMC4635013; doi:10.1371/journal.pone.0142192), 2015-11-05
Supplement: pone.0142192.s005.pdf [file pone.0142192.s005.pdf]

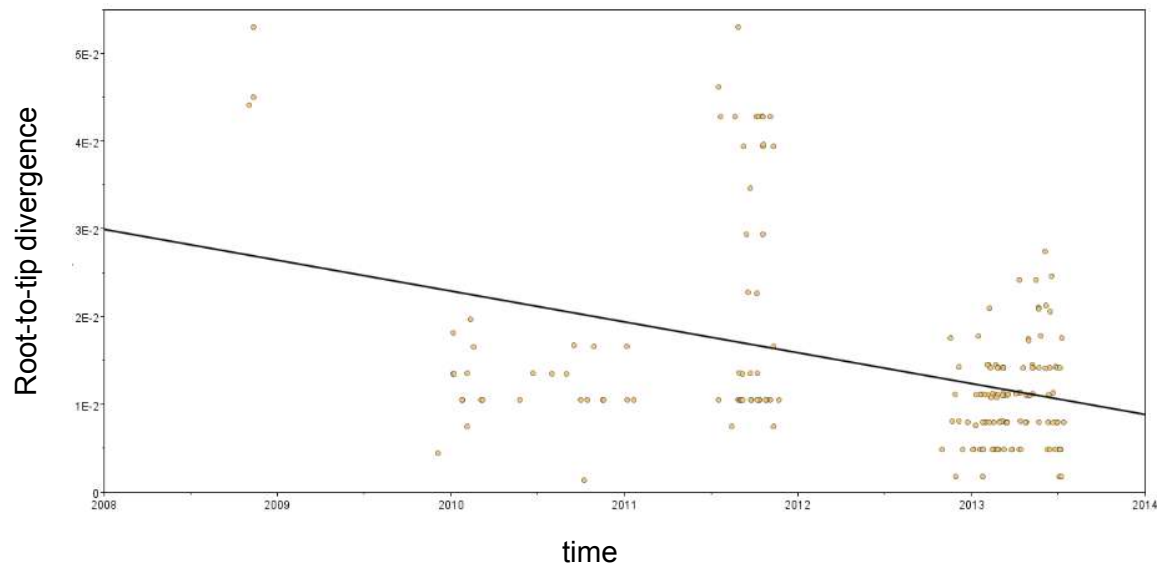

**Figure S5.** Root-to-tip linear regression of BA9 strains circulating from May 2008 - July 2013.

The  $r$  value was  $-0.3722$  and the  $r^2$  value was  $0.1386$ .
