# Supplementary material for: Molecular Characterization of Human Respiratory Syncytial Virus in the Philippines, 2012-2013
Source: PubMed Central journal article supplement (PMC4635013; doi:10.1371/journal.pone.0142192), 2015-11-05
Supplement: pone.0142192.s007.pdf [file pone.0142192.s007.pdf]

**Table S1.** Nucleotide sequences of G gene-specific primers used in real-time polymerase chain reaction for HRSV screening.

| <b>Primer name</b>   | <b>Sequence (5'→3')</b>                        | <b>Position</b> |
|----------------------|------------------------------------------------|-----------------|
| Forward              | GCTCTTAGCAAAGTCAAGTTRAATGATACA                 | 1143-1172       |
| Reverse <sup>a</sup> | GTTTYTGACATCATAATTRGGAGT                       | 1266-1242       |
| Probe <sup>b</sup>   | VIC-CTRTCATCCAGCAAATAYACYATCCAACGKAGYACAGG-MGB | 1191-1228       |

Nucleotide position of primer annealing site based on HRSVA strain A2 (M74568)

<sup>a, b</sup> modified from Bonroy C, Vankeerberghen A, Boel A, De Beenhouwer H. Use of a multiplex real-time PCR to study the incidence of human metapneumovirus and human respiratory syncytial virus infections during two winter seasons in a Belgian paediatric hospital. Clin Microbiol Infect. 2007; 13: 504-9.
